sitivity.<sup>3</sup> Furthermore, it is hardly possible to draw clear conclusions from the rather fragmentary data reported for man (see cases reviewed in the Addendum by Ablett,<sup>4</sup> case report by Wilson<sup>5</sup> and review by Green<sup>6</sup>), which are greatly complicated by polypharmacy and grave illness, particularly tetanus and leukemia. There appears to be a lack of information about the safety of prolonged exposure to nitrous oxide under other conditions in man, and it may be that we are overlooking a drug that would be valuable in preventing needless suffering in patients undergoing prolonged artificial ventilation. The problem will be resolved only by careful study of patients under the relevant clinical conditions.

JOHN F. NUNN, M.D.  
JEAN E. STURROCK, M.PHIL.  
*Clinical Research Centre*

Anesthesiology  
49:54, 1978

*In reply:*—It is a pleasure to respond to the letter of Drs. Nunn and Sturrock. Their studies of the cellular effects of anesthetics have established the standard for all workers in this exciting field.

They raise three concerns: The first is the lack of details in our recent publication on the use of intermittent nitrous oxide.<sup>1</sup> In that paper, we cited our earlier publication as a reference for the method.<sup>2</sup> The second concern relates to our citation of their paper suggesting an effect of nitrous oxide on the growth of bone marrow stem cells in culture.<sup>3</sup> After rereading their paper, I remain with the impression that cell suppression by nitrous oxide alone was nearly significant, suggesting a subthreshold concentration for this model. Thus, when mixed with subthreshold halothane, the occurrence of an additive effect was not surprising. Nevertheless, I will accept their statement that "nitrous oxide, 75 per cent, had no significant effect on growth. . . ." The third relates to fear, possibly needless, of prolonged use of nitrous oxide in man. Some of our experiences regarding its safety for prolonged use as an analgesic in man were pre-

Anesthesiology  
49:54-55, 1978

### Anesthesia Does Not Cause Metabolic Stress

*To the Editor:*—In their otherwise excellent review, Drs. Blackburn, Maini and Pierce state that: "the induction of anesthesia initiates the (metabolic) response to injury, while most surgical procedures 60 to 90 min in duration do not augment this stress further."<sup>1</sup>

*Division of Anaesthesia  
Watford Road, Harrow, Middlesex HA1 3UJ  
England*

#### REFERENCES

1. Kripke BJ, Talarico L, Shah NK, et al: Hematologic reaction to prolonged exposure to nitrous oxide. *ANESTHESIOLOGY* 47:342-348, 1977
2. Nunn JF, Sturrock JE, Howell A: Effect of inhalational anesthetics on division of bone-marrow cells *in vitro*. *Br J Anaesth* 48:75-81, 1976
3. Green CD: Strain sensitivity of rats to nitrous oxide. *Anesth Analg (Cleve)* 47:509-514, 1968
4. Ablett JJJL: Tetanus and the anaesthetist. *Br J Anaesth* 28: 258-273, 1956
5. Wilson P, Martin FIR, Last PM: Bone marrow depression in tetanus. *Lancet* 2:442-443, 1956
6. Green CD: Toxicity of nitrous oxide, *Clinical Anesthesia*. Edited by Eastwood DW. Philadelphia, F. A. Davis, 1964, pp 38-44

(Accepted for publication January 19, 1978.)

viously reported.<sup>4</sup> We concur that the safety of nitrous oxide for prolonged use should be reviewed.

BENJAMIN J. KRIPKE, M.D.  
*Professor and Associate Chairman  
of Anesthesiology  
Boston University School of Medicine  
75 East Newton Street  
Boston, Massachusetts 02118*

#### REFERENCES

1. Kripke BJ, Talarico L, Shah NK, et al: Hematologic reaction to prolonged exposure to nitrous oxide. *ANESTHESIOLOGY* 47:342-348, 1977
2. Kripke, BJ, Kelman AD, Shah NK, et al: Testicular reaction to prolonged exposure to nitrous oxide. *ANESTHESIOLOGY* 44:104-113, 1976
3. Nunn JF, Sturrock JE, Howell A: Effect of anaesthetics on Division of bone-marrow cells *in vitro*. *Br J Anaesth* 48:75-81, 1976
4. Kripke BJ, Hechtman HB: Nitrous oxide for pentazocine addiction and for intractable pain: Report of case. *Anesth Analg (Cleve)* 51:520-527, 1972

(Accepted for publication January 19, 1978.)

We believe that this statement is not correct. First, the documentation given for the above statement is incorrect, since the article referred to deals with the extent and composition of postoperative weight loss. Second, several studies have shown that anesthetic
